# Supplementary material for: Correction: MALDI-IMS combined with shotgun proteomics identify and localize new factors in male infertility
Source: PubMed Central journal article supplement (PMC7918713; doi:10.26508/lsa.202101015), 2021-01-21
Supplement: LSA-2021-01015_review_history.pdf [file LSA-2021-01015_review_history.pdf]

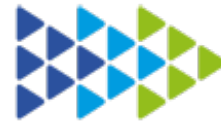

Life Science Alliance

# Correction: MALDI-IMS combined with shotgun proteomics identify and localize new factors in male ...

Axel Imhof, Shibojyoti Lahiri, Wasim Aftab, Lena Walenta, Leena Strauss, Matti Poutanen, and Artur Mayerhofer

DOI: <https://doi.org/10.26508/lsa.202101015>

*Corresponding author(s): Axel Imhof, Ludwig-Maximilians-University of Munich*

---

## Review Timeline:

Submission Date: 2021-01-08

Accepted: 2021-01-08

---

*Scientific Editor: Shachi Bhatt*

## Transaction Report:

(Note: With the exception of the correction of typographical or spelling errors that could be a source of ambiguity, letters and reports are not edited. The original formatting of letters and referee reports may not be reflected in this compilation.)

January 8, 2021

RE: Life Science Alliance Manuscript #LSA-2021-01015

Dr. Axel Imhof  
Ludwig-Maximilians-University of Munich  
Munich Center of Integrated Protein Science and BioMedical Centre  
Großhadernerstr. 9  
Planegg-Martinsried 82152  
Germany

Dear Dr. Imhof,

This is to inform you that we are issuing a Correction entitled "Correction: MALDI-IMS combined with shotgun proteomics identify and localize new factors in male ...". for your manuscript, to notify everyone labels for mass were mistakenly listed as kilodaltons (kD) instead of dalton (D).

Apologies for this inconvenience.

Sincerely,

Shachi Bhatt, Ph.D.  
Executive Editor  
Life Science Alliance  
<https://www.lsjournal.org/>  
Tweet @SciBhatt @LSAJournal

January 8, 2021

RE: Life Science Alliance Manuscript #LSA-2021-01015

Dr. Axel Imhof  
Ludwig-Maximilians-University of Munich  
Munich Center of Integrated Protein Science and BioMedical Centre  
Großhadernerstr. 9  
Planegg-Martinsried 82152  
Germany

Dear Dr. Imhof,

This is to inform you that we are issuing a Correction entitled "Correction: MALDI-IMS combined with shotgun proteomics identify and localize new factors in male ...". for your manuscript, to notify everyone labels for mass were mistakenly listed as kilodaltons (kD) instead of dalton (D).

Apologies for this inconvenience.

Sincerely,

Shachi Bhatt, Ph.D.  
Executive Editor  
Life Science Alliance  
<https://www.lsjournal.org/>  
Tweet @SciBhatt @LSAJournal
